# Supplementary material for: Single molecule force spectroscopy reveals that a two-coordinate ferric site is critical for the folding of holo-rubredoxin
Source: Royal Society of Chemistry journal article supplement (doi:10.1039/d0nr06275h), 2020-01-01
Supplement: d0nr06275h1.pdf [file d0nr06275h1.pdf]

# Single Molecule Force Spectroscopy Reveals That Two-coordinate Ferric Site Is Critical for The Folding of Holo-rubredoxin

Jiayu Li and Hongbin Li\*

## Supplementary Information

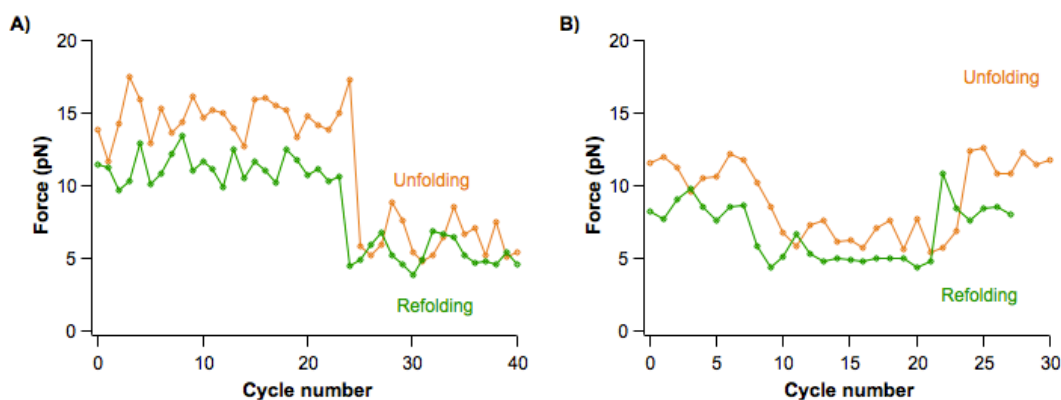

Figure S1. Unfolding (orange) and refolding (green) forces of two apo-RD molecules in consecutive unfolding-refolding cycles. The synchronous changes of unfolding and refolding forces indicate the switch of apo-RD between apo-RD<sub>H</sub> and apo-RD<sub>L</sub>.

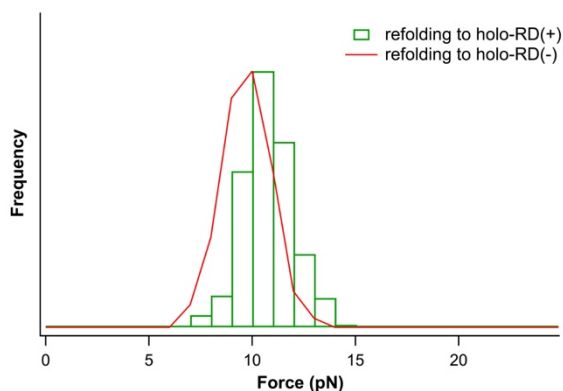

Figure S2. Refolding force distribution of unfolded holo-RD<sub>H</sub> leading to holo-RD(+) versus those leading to holo-RD(-). Both histograms have the same bin size (1 pN). For clarity, only the refolding to holo-RD(+) data is displayed as a bar chart.

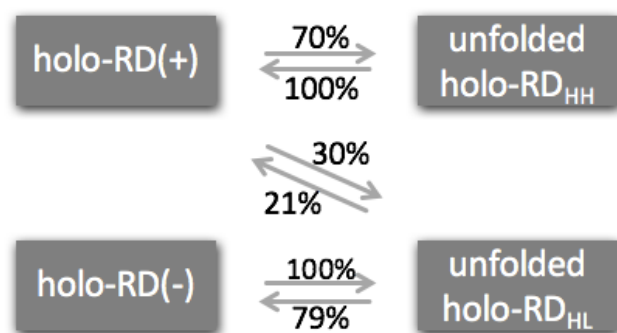

Figure S3. 4-state Markov chain model for unfolding and refolding of holo-RD. The transition probability between states is calculated from experimental data and indicated in the schematics.

Table S1. Calculated and experimental occupancy of each species in the unfolding-refolding process of holo-RD.

|                        | holo-RD(+) | holo-RD(-) | unfolded holo-RD <sub>HH</sub> | unfolded holo-RD <sub>HL</sub> |
|------------------------|------------|------------|--------------------------------|--------------------------------|
| Calculated occupancy   | 0.47       | 0.53       | 0.33                           | 0.67                           |
| Experimental occupancy | 0.39       | 0.61       | 0.30                           | 0.70                           |
